# Supplementary material
Source: MDPI journal article supplement (https://www.mdpi.com/1424-8247/17/5/653)
Supplement: s1 [file s1]

# Supplementary Material

**Peiling Zhao<sup>1,†</sup>, Mengzhen Xu<sup>1,†</sup>, Kai Gong<sup>1</sup>,  
Kaihui Lu<sup>1</sup>, Chen Ruan<sup>2</sup>, Xin Yu<sup>1</sup>, Jiang Zhu<sup>1</sup>,  
Haixing Guan<sup>3,4,5,\*</sup> and Qingjun Zhu<sup>1,5,\*</sup>**

1 Innovative Institute of Chinese Medicine and Pharmacy, Shandong University of Traditional Chinese Medicine, Jinan 250355, China;

2 School of Pharmacy, Shandong University of traditional Chinese Medicine, Jinan 250355, China;

3 Experimental Center, Shandong University of Traditional Chinese Medicine, Jinan 250355, China;

4 Shandong Provincial Key Laboratory of Traditional Chinese Medicine, Shandong University of Traditional Chinese Medicine, Jinan 250355, China;

5 Key Laboratory of Traditional Chinese Medicine Classical Theory, Ministry of Education, Shandong University of Traditional Chinese Medicine, Jinan 250355, China;

† These authors contributed equally to this work.

\* Correspondence: haixingguan@163.com(H.G.) , zhuqingjunhotmail@gmail.com(Q.Z.).

## Table and Figure Caption

**Figure S1.** <sup>1</sup>H NMR spectra of compound **2',4'-dimethoxychalcone**

**Figure S2.** <sup>13</sup>C NMR spectra of compound **2',4'-dimethoxychalcone**

**Figure S3.** HPLC of **2',4'-dimethoxychalcone**.

**Figure S4.** Effect of **2',4'-dimethoxychalcone** 48h on the activity of A549 cells

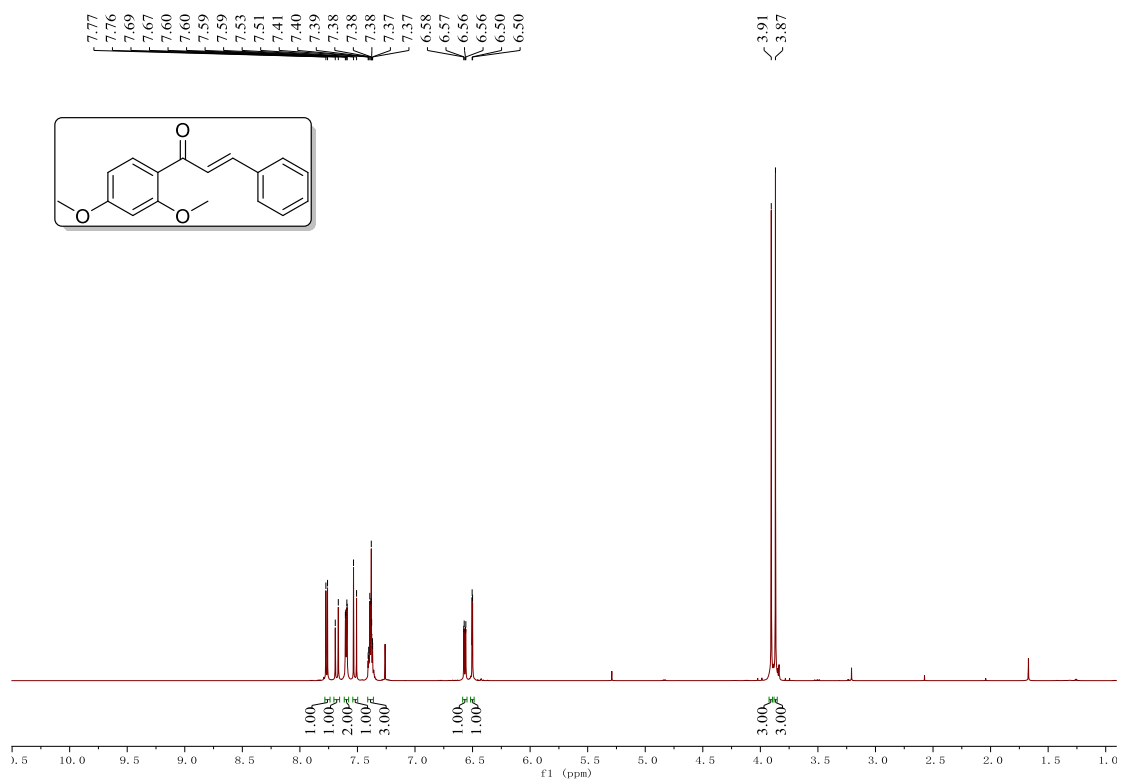

**Figure S1.** <sup>1</sup>H NMR spectra of 2',4'-dimethoxychalcone

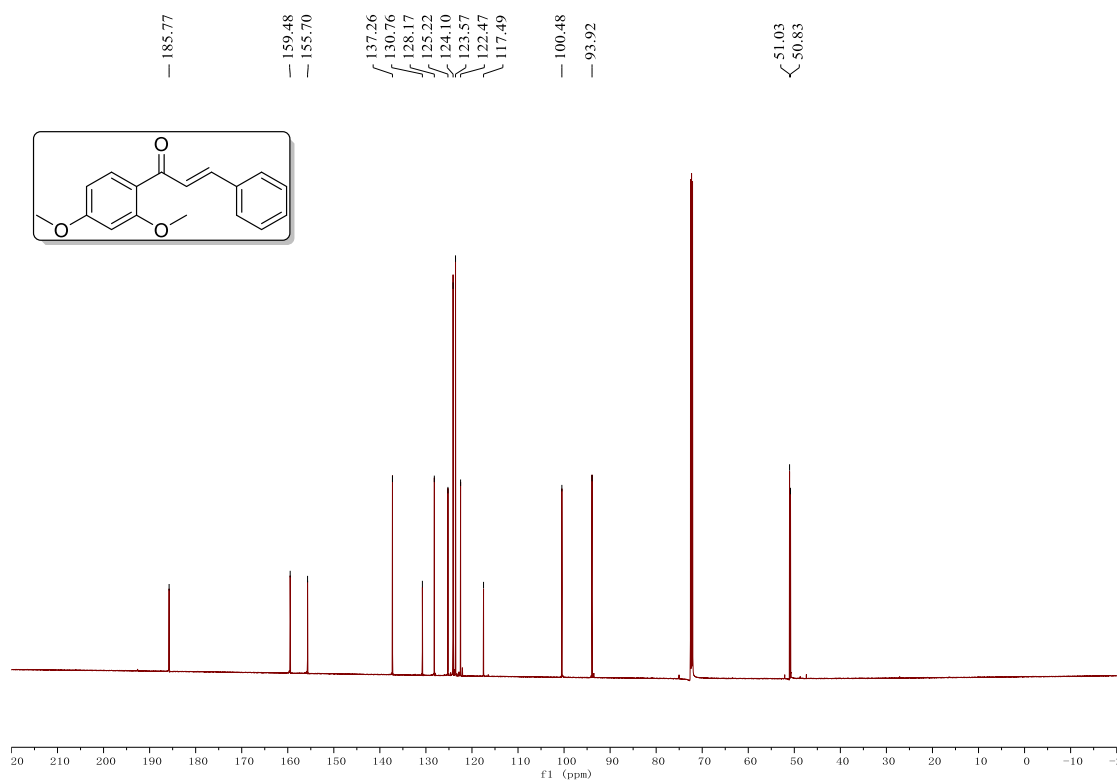

**Figure S2.** <sup>13</sup>C NMR spectra of 2',4'-dimethoxychalcone

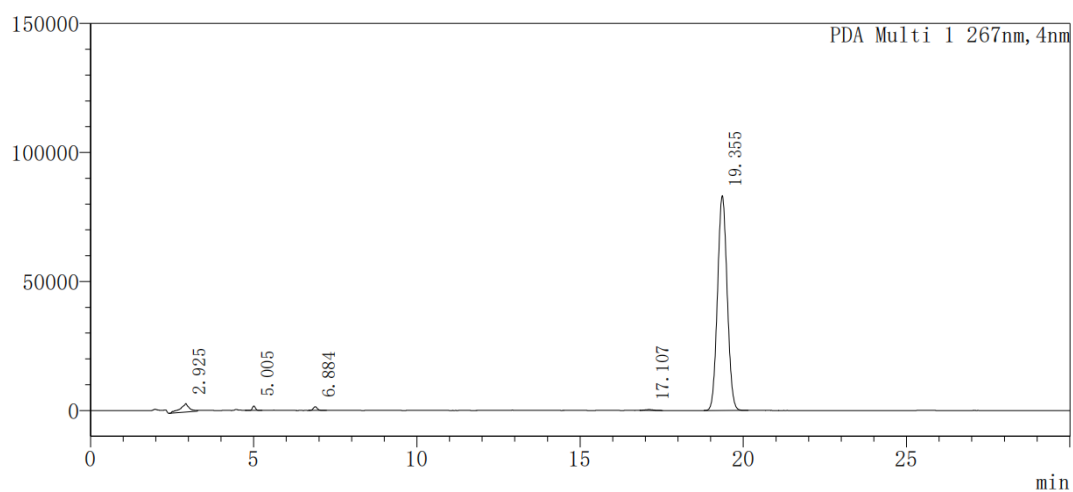

**Figure S3.** HPLC of 2',4'-dimethoxychalcone.

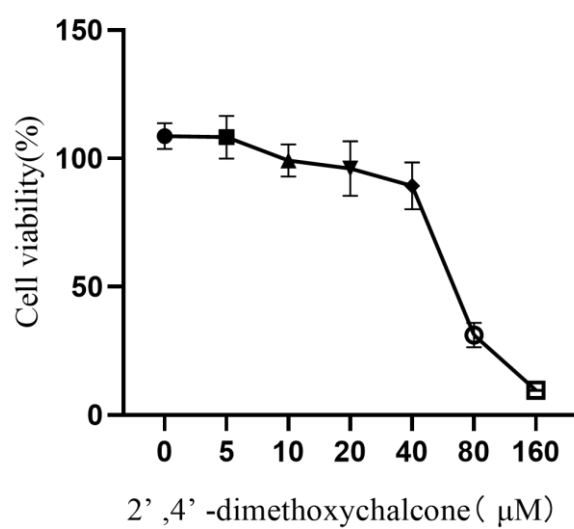

**Figure S4.** Effect of 2',4'-dimethoxychalcone 48h on the activity of A549 cells
